# Supplementary material for: Facile synthesis of a bulky BPTPA donor group suitable for cobalt electrolyte based dye sensitized solar cells
Source: Royal Society of Chemistry journal article supplement (doi:10.1039/c3ta10632b), 2013-01-01
Supplement: c3ta10632b.pdf [file c3ta10632b.pdf]

## Supporting information

Bulky BPTPA donor for efficient Iodine-Free Dye-Sensitized Solar Cells:

Facile Synthesis and device performance

Peng Gao,<sup>a</sup> Yongjoo Kim,<sup>ab</sup> Jun-Ho Yum,<sup>a</sup> Thomas W. Holcombe,<sup>a</sup> Mohammad K. Nazeeruddin,<sup>a</sup> and Michael Grätzel<sup>a</sup>

<sup>a</sup> *Laboratory for Photonics and Interfaces, Institution of Chemical Sciences and Engineering, School of Basic Sciences, Swiss Federal Institute of Technology, CH-1015 Lausanne, Switzerland.*

*E-mail: xxx@aaa.bbb.ccc*

<sup>b</sup> *R & D Center DSC Team, Dongjin Semichem Co., LTD. 445-935 Hwasung, South Korea*

Density functional theory (DFT) calculation at the M06/6-31G\* level

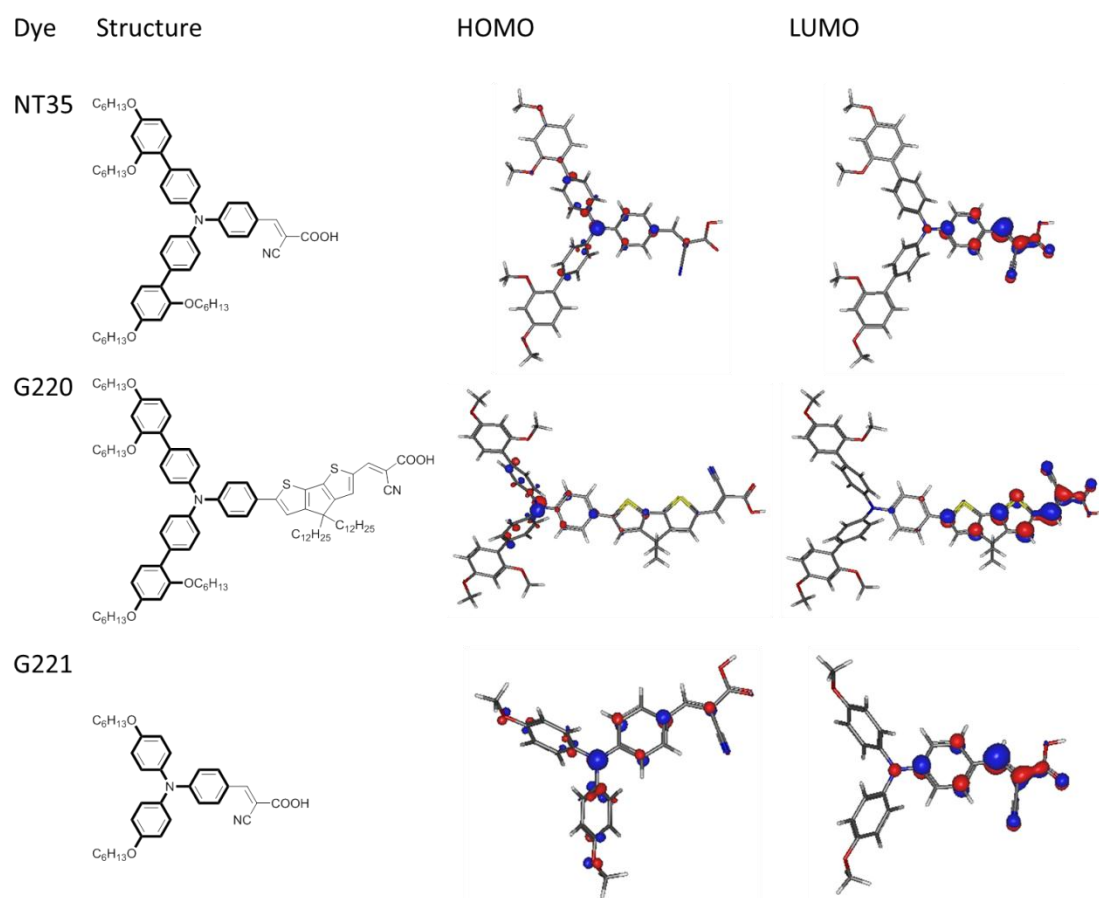

**Figure S1.** Density functional theory (DFT) at the M06/6-31G\* level in an SMD (methylene chloride) solvation model
